REVIEW

# The Case for Live Attenuated Vaccines against the Neglected Zoonotic Diseases Brucellosis and Bovine Tuberculosis

**Aseem Pandey<sup>1,2,3\*</sup>, Ana Cabello<sup>2</sup>, Lavoisier Akoolo<sup>2</sup>, Allison Rice-Ficht<sup>2,4</sup>, Angela Arenas-Gamboa<sup>2</sup>, David McMurray<sup>1</sup>, Thomas A. Ficht<sup>2</sup>, Paul de Figueiredo<sup>1,2,3\*</sup>**

**1** Department of Microbial Pathogenesis and Immunology, Texas A&M Health Science Center, Bryan, Texas, United States of America, **2** Department of Veterinary Pathobiology, Texas A&M University, College Station, Texas, United States of America, **3** Norman Borlaug Center, Texas A&M University, College Station, Texas, United States of America, **4** Department of Molecular and Cellular Medicine, Texas A&M Health Science Center, Bryan, Texas, United States of America

\* [apandey@cvm.tamu.edu](mailto:apandey@cvm.tamu.edu) (AP); [pjdefigueiredo@tamu.edu](mailto:pjdefigueiredo@tamu.edu) (PdF)

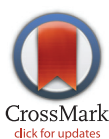

**OPEN ACCESS**

**Citation:** Pandey A, Cabello A, Akoolo L, Rice-Ficht A, Arenas-Gamboa A, McMurray D, et al. (2016) The Case for Live Attenuated Vaccines against the Neglected Zoonotic Diseases Brucellosis and Bovine Tuberculosis. *PLoS Negl Trop Dis* 10(8): e0004572. doi:10.1371/journal.pntd.0004572

**Editor:** Joseph M. Vinetz, University of California San Diego School of Medicine, UNITED STATES

**Published:** August 18, 2016

**Copyright:** © 2016 Pandey et al. This is an open access article distributed under the terms of the [Creative Commons Attribution License](https://creativecommons.org/licenses/by/4.0/), which permits unrestricted use, distribution, and reproduction in any medium, provided the original author and source are credited.

**Funding:** This review was supported by grants from the Bill & Melinda Gates Foundation, the Defense Threat Reduction Agency, the Texas A&M University-Weizmann Grant Program, the Texas A&M CAPES program, and Texas A&M AgriLife Research to PdF, the NIH R01HD084339, R01AI048496 and U54 AI057156-0100 to TAF, NIH R21AI107135 and K01TW009981 and USDA-NIFA 1002605 to AAG. Any opinions, findings, and conclusions or recommendations expressed in this material are those of the author(s) and do not necessarily reflect the views of the funding agencies. The funders had no role in study design, data collection and analysis, decision to publish, or preparation of the manuscript.

## Abstract

Vaccination of humans and animals with live attenuated organisms has proven to be an effective means of combatting some important infectious diseases. In fact, the 20th century witnessed tremendous improvements in human and animal health worldwide as a consequence of large-scale vaccination programs with live attenuated vaccines (LAVs). Here, we use the neglected zoonotic diseases brucellosis and bovine tuberculosis (BTb) caused by *Brucella* spp. and *Mycobacterium bovis* (*M. bovis*), respectively, as comparative models to outline the merits of LAV platforms with emphasis on molecular strategies that have been pursued to generate LAVs with enhanced vaccine safety and efficacy profiles. Finally, we discuss the prospects of LAV platforms in the fight against brucellosis and BTb and outline new avenues for future research towards developing effective vaccines using LAV platforms.

## Background

Vaccination provides the most effective means of preventing and eradicating infectious diseases, and historically, live attenuated vaccines (LAVs) have proven effective in protecting humans and animals from infection. LAVs are weakened versions of the pathogen, obtained by disrupting or mutating one or more genes, which renders the pathogen incapable of causing disease; however, the pathogen remains sufficiently potent to educate the immune system to initiate and establish highly specific short-term or lifelong immunity [1]. LAVs offer a promising approach because they fail to induce disease in vaccinated individuals while simultaneously mimicking natural properties of the virulent organism, including cell invasion and tissue tropism [2], and presentation of a broad repertoire of antigens [3]. Moreover, LAVs have been successfully used as vaccines for several human diseases of bacterial or viral origin [4–7]. Importantly, for some diseases, including brucellosis and bovine tuberculosis (BTb), LAVs have demonstrated greater efficacy and/or safety in various model systems than competing subunit vaccine platforms (Table 1) [8–12]. Therefore, LAVs have demonstrated safety and efficacy in human and animal populations and provide an attractive strategy for combatting

**Competing Interests:** The authors have declared that no competing interests exist.

neglected zoonotic diseases. Here, we provide a broad overview of LAV technology, describe recent progress in the development of this approach for neglected diseases, and outline challenges that must be addressed to develop vaccines with broad safety and efficacy profiles. We use a comparative model to frame our discussion of these issues, and focus on brucellosis and BTb, which have been designated as neglected zoonotic diseases by the World Health Organization [13,14].

Brucellosis, also called Bang's disease, is a worldwide zoonosis of profound importance [40]. Globally, half a million people develop infection each year [40], and millions of livestock are either infected or potentially at risk of acquiring infection [41]. Despite these reports, the actual numbers are suspected to be 2–5 times higher because of chronic under-reporting of infection and misdiagnosis [40]. Although brucellosis prevalence is low in most of the Western world, it is endemic in human and livestock populations in Asia, South and Central America, and sub-Saharan Africa [42–47] and affects not only the health but also the livelihood of people who rely upon livestock-related economic activities [47].

In humans, brucellosis typically presents as an undulant fever but gradually becomes systemic, affecting practically every organ system of the body with protracted symptoms of arthralgia, myalgia, and debilitation [48]. In ruminants, the reproductive system is a common site of infection, and the disease during gestation increases the risk of spontaneous abortion and human exposure [49]. Brucellosis has eluded systematic attempts at eradication for more than a century [50], even in most developed countries, and so far no vaccine is approved for human use [3]. Human brucellosis is associated with low rates of mortality and high rates of morbidity, and hence, *Brucella* has the potential to render patients severely debilitated, which can perpetuate poverty and tax health care resources [51,52]. Although combination antibiotic therapy can be used to treat *Brucella* infection, typical treatment regimens are prolonged and are often accompanied by unwanted side effects [53].

The intracellular bacteria *Mycobacterium bovis* induces both pulmonary and extrapulmonary symptoms in humans and animals [54]. *M. bovis* shares 99.95% genome sequence similarity with *M. tuberculosis* and a live attenuated version of the pathogen, Bacillus Calmette–Guérin (BCG), provides the current and only widely used vaccine against tuberculosis [55]. The global incidence of tuberculosis caused by *M. bovis* in humans as well as a wide variety of animal species is increasing. More than 50 million cattle are estimated to be infected with the pathogen worldwide [56], resulting in more than US\$3 billion in agricultural losses annually [57]. *M. bovis* infection of humans presents with similar symptoms as *M. tuberculosis*; however, human infection with virulent *M. bovis* infection is not responsive to the antibiotic treatment commonly used to treat *M. tuberculosis* [58]. Although BTb has been eradicated from most of the developed world through regular tuberculin testing and culling of infected livestock [59], wildlife reservoirs of the causative agent constitute a significant global veterinary and public health threat [60], especially in resource-poor regions where culling is neither affordable nor practical [59].

The pathogenic programs of *Brucella* and *M. bovis* share similar features that support LAV development. First, the unavailability of highly effective subunit vaccines that protect humans against these pathogens can be largely attributed to their intricate immune evasion strategies [61–67]. However, recent advances in vaccinology suggest that improved LAVs for animal (and eventually human) use against these diseases may be within striking distance [3]. Therefore, these organisms provide a useful comparative model for considering progress in LAV development. Second, *Brucella* spp. and *M. bovis* are intracellular vacuolar pathogens that establish replicative niches within acidic compartments of professional phagocytic cells [68] and therefore have evolved mechanisms to subvert host factors [69] including conserved innate immune defenses [70], phagosome maturation [67] and phagolysosome acidification [68].

**Table 1. Live attenuated vaccines.**

| Strain Name or Gene Deleted    | Species Tested in | Challenge Strain/ Dose/Route           | Efficacy/Protection against Abortion | Vaccination Dose/ Route     | USDA Approval Status/ Comments | References |
|--------------------------------|-------------------|----------------------------------------|--------------------------------------|-----------------------------|--------------------------------|------------|
| <b><i>Brucella</i> spp.</b>    |                   |                                        |                                      |                             |                                |            |
| <b><i>B. abortus</i></b>       |                   |                                        |                                      |                             |                                |            |
| <i>Δbp26</i>                   | Cattle            | B.a (2308) 3 × 10 <sup>8</sup> (SC)    | 81%                                  | 1 × 10 <sup>10</sup> (SC)   | Experimental                   | [15]       |
| <i>Δp39</i>                    | Mice              | B.a 2 × 10 <sup>5</sup> (IP)           | 99%                                  | 1 × 10 <sup>5</sup> (SC)    | Experimental                   | [16]       |
| <i>Δpgk</i>                    | Mice              | B.a 1 × 10 <sup>5</sup> (IP)           | 99%                                  | 1 × 10 <sup>5</sup> (IP)    | Experimental                   | [17]       |
| <i>Δpgm</i>                    | Mice              | B.a (2308) 5 × 10 <sup>5</sup> (SC)    | 99%                                  | 1 × 10 <sup>7</sup> (IP)    | Experimental                   | [18]       |
| <i>RB51</i>                    | Cattle            | B.a (2308) 1.5 × 10 <sup>10</sup> (IC) | 100%                                 | 3 × 10 <sup>8</sup> (SC)    | Approved for animal use        | [19]       |
| <i>S19</i>                     | Bison             | B.a (2308) 1 × 10 <sup>7</sup> (IC)    | 67%                                  | 5.3 × 10 <sup>6</sup> (SC)  | Approved for veterinary use    | [20]       |
| <i>S19</i>                     | Cattle            | B.a (2308) 9 × 10 <sup>4</sup> (IC)    | 70%–91%                              | 1 × 10 <sup>9</sup> (SC)    | Approved for veterinary use    | [21]       |
| <i>ΔvjbR</i>                   | Mice              | B.a 1 × 10 <sup>5</sup> (IP)           | 99%                                  | 1 × 10 <sup>5</sup> (IP)    | Experimental                   | [22]       |
| <i>ΔwbkC</i>                   | Mice              | B.a 1 × 10 <sup>6</sup> (SC)           | 73%                                  | 1 × 10 <sup>8</sup> (IP)    | Experimental                   | [23]       |
| <i>ΔznuA</i>                   | Mice              | B.a 5 × 10 <sup>4</sup> (SC)           | 90%                                  | 1 × 10 <sup>8</sup> (IP)    | Experimental                   | [24]       |
| <b><i>B. melitensis</i></b>    |                   |                                        |                                      |                             |                                |            |
| <i>Δasp24</i>                  | Goat              | B.m 1 × 10 <sup>7</sup> (IC)           | 62%                                  | 1 × 10 <sup>6</sup> (IP)    | Experimental                   | [25]       |
| <i>Δbp26</i>                   | Sheep             | B.o 1.7 × 10 <sup>9</sup> (IPre)       | 100%                                 | 1 × 10 <sup>9</sup> (SC)    | Experimental                   | [26]       |
| <i>Δbp26</i> and <i>Δomp31</i> | Sheep             | B.o 1.7 × 10 <sup>9</sup> (IPre)       | 84%                                  | 1 × 10 <sup>9</sup> (SC)    | Experimental                   | [26]       |
| <i>ΔhtrA</i>                   | Goats             | B.m 1 × 10 <sup>7</sup> (IC)           | 100%                                 | 1 × 10 <sup>9</sup> (SC)    | Experimental                   | [27]       |
| <i>ΔmanBA</i>                  | Mice              | B.m 1 × 10 <sup>4</sup> (IC)           | 87%                                  | 1 × 10 <sup>6</sup> (IP)    | Experimental                   | [25]       |
| <i>ΔmucR</i>                   | Mice              | B.m 5 × 10 <sup>9</sup> (IN)           | 99%                                  | 1 × 10 <sup>6</sup> (IP)    | Experimental                   | [28]       |
| <i>Δomp25</i>                  | Goats             | B.m 1 × 10 <sup>7</sup> (IC)           | 100%                                 | 1 × 10 <sup>9</sup> (SC)    | Experimental                   | [29]       |
| <i>Δper</i>                    | Sheep             | B.m 4.9 × 10 <sup>7</sup> (IM)         | 36%                                  | 1 × 10 <sup>10</sup> (SC)   | Experimental                   | [30]       |
| <i>ΔpurEK</i>                  | Mice              | B.m 1 × 10 <sup>4</sup> (IN)           | 99%                                  | 1 × 10 <sup>11</sup> (oral) | Experimental                   | [31]       |
| <i>Rev 1</i>                   | Goats             | B.m 16M 1.25 × 10 <sup>6</sup> (SC)    | 100%                                 | 1.5 × 10 <sup>6</sup> (SC)  | Approved for animal use        | [32]       |
| <i>ΔvirB2</i>                  | Goats             | B.m 1 × 10 <sup>7</sup> (SC)           | 75%                                  | 1 × 10 <sup>9</sup> (SC)    | Experimental                   | [25]       |
| <i>ΔvirB2</i>                  | Goat              | B.m 1 × 10 <sup>7</sup> (IC)           | 75%                                  | 1 × 10 <sup>9</sup> (SC)    | Experimental                   | [25]       |
| <i>ΔvjbR</i>                   | Mice              | B.m 16M 1 × 10 <sup>5</sup> (IP)       | 60%                                  | 1 × 10 <sup>5</sup> (IP)    | Experimental                   | [33]       |
| <i>Δwa</i>                     | Sheep             | B.m 4.9 × 10 <sup>7</sup> (IC)         | 31%                                  | 1 × 10 <sup>10</sup> (SC)   | Experimental                   | [30]       |
| <i>ΔwbkF</i>                   | Mice              | B.m 4.9 × 10 <sup>7</sup> (IC)         | 54%                                  | 1 × 10 <sup>10</sup> (SC)   | Experimental                   | [30]       |
| <i>ΔwboA</i>                   | Goat              | B.m 1 × 10 <sup>7</sup> (IC)           | 20%                                  | 1 × 10 <sup>9</sup> (SC)    | Experimental                   | [34]       |
| <b><i>B. ovis</i></b>          |                   |                                        |                                      |                             |                                |            |
| <i>ΔabcBA</i>                  | Rams              | B.o 3.6 × 10 <sup>9</sup> (IPre/IC)    | 100%                                 | 1 × 10 <sup>9</sup> (SC)    | Experimental                   | [35]       |
| <b><i>M. bovis</i> (BCG)</b>   |                   |                                        |                                      |                             |                                |            |
| <i>BCG</i>                     | Cattle            | M.b 1 × 10 <sup>3</sup> (Aer)          | 64%                                  | 1 × 10 <sup>3</sup> (Aer)   | Approved for animal use        | [36]       |
| <i>ΔLeuD</i>                   | Cattle            | M.b 1 × 10 <sup>6</sup> (SC)           | 60%                                  | 1 × 10 <sup>6</sup> (IN)    | Experimental                   | [37]       |
| <i>Δmce2</i>                   | Cattle            | M.b 1 × 10 <sup>6</sup> (SC)           | 80%–90%                              | 1 × 10 <sup>6</sup> (IT)    | Experimental                   | [38]       |
| <i>Δp27-p55</i>                | Mice              | M.b 1 × 10 <sup>5</sup> (SC)           | 96%                                  | 1.25 × 10 <sup>6</sup> (IT) | Experimental                   | [39]       |
| <i>RD1</i>                     | Cattle            | M.b 1 × 10 <sup>3</sup> (Aer)          | 80%                                  | 1 × 10 <sup>3</sup> (Aer)   | Experimental                   | [36]       |

Abbreviations: Aer, Aerosol; B.a, *Brucella abortus*; BCG, Bacillus Calmette–Guérin; B.m, *B. melitensis*; B.o, *B. ovis*; IC, intraconjunctival; IM, intramuscular; IN, intranasal; IP, intraperitoneal; IPre, intrapreputial; IT, intratracheal; M.b, *Mycobacterium bovis*; SC, subcutaneous; USDA, US Department of Agriculture

doi:10.1371/journal.pntd.0004572.t001

Therefore, vaccines that activate macrophage-mediated killing of resident pathogens [71] or stimulate activation of cytotoxic T lymphocytes that kill infected cells are desirable. Finally, gaining a better understanding of interactions between *M. bovis* and *Brucella* spp. and their respective host proteins will reveal novel avenues for engineering next-generation LAVs. The purpose of this article is not to comprehensively review the development of vaccines for *M. bovis* or *Brucella* spp., which can be found elsewhere [72–76], but rather to use a comparative approach with vaccines directed against these pathogens to elucidate the utility of LAVs for neglected zoonotic bacterial diseases.

### Early Development and Use of LAVs

Several approaches to LAV generation have been described (Table 2), including serial passage of the virulent organism [77], use of nonhost species for vaccination, exposure to varying culture conditions or irradiation [78], or the identification and deletion of genes that contribute to symptomology or disease progression [33]. Historically, attenuation by serial passage has been a preferred approach for LAV generation, and based on this, many important vaccines, including the BCG vaccine against tuberculosis, have been successfully developed [79]. This approach involves multiple cycles of growth of the bacteria under cultivation conditions that ultimately lead to an accumulation of genetic mutations that result in altered virulence. For example, 13 years of serially passaging *M. bovis* resulted in attenuation and subsequent establishment of *M. bovis* BCG [55]. Serial subculturing has been shown to induce various types of mutations that significantly alter the virulence of the organism, although serial passage can also sometimes induce fitness-increasing mutations that enhance bacterial survival [80]. Strains with attenuated virulence and normal replication rates constitute useful reagents for the development of LAVs against *M. bovis*. Serial passage has also been used to generate *Brucella* vaccines strains. For example, RB51 is a spontaneous rough mutant derived using repeated passage of *Brucella abortus* strain 2308 in vitro [81]. The main drawbacks to serial passage as a strategy for deriving LAV strains are that it neither reveals the molecular mechanisms that cause attenuation nor guarantees that a safe and effective vaccine will result from the effort. In fact, some vaccines prepared in this fashion, including *B. abortus* strains 45/20 [82], proved to be nonprotective or

**Table 2. Approaches to LAV generation.**

| Approaches                                                               | Advantages                                                               | Disadvantages                                                                                              |
|--------------------------------------------------------------------------|--------------------------------------------------------------------------|------------------------------------------------------------------------------------------------------------|
| <b>Multiple Passages, Chemical, Physical, or Nontargeted Mutagenesis</b> | Contains broad antigenic determinants [83,84]                            | May induce disease [83,92,93]                                                                              |
|                                                                          | Relatively easy to generate [85]                                         | Genomic loci of mutations may be initially unknown, or genetic instability may be observed [94]            |
|                                                                          | Induction of humoral and cellular immune responses [86,87]               | Risk of acquisition of antibiotic-resistant phenotypes                                                     |
|                                                                          | Various degrees of durable immunity elicited [88,89]                     | Difficult to distinguish between animals naturally infected from those immunized [95]                      |
|                                                                          | Adjuvant not required for protective efficacy [22,89]                    | Antibiotic resistance selectable markers used for generation of mutants may lead to regulatory hurdles     |
|                                                                          | Loss of virulence factors encoded by extra chromosomal plasmids [90,91]  |                                                                                                            |
| <b>Targeted Gene Deletion</b>                                            | Expected genetic stability of mutations                                  | Possible recombination events with dormant genes and consequent safety implications                        |
|                                                                          | Reduced risk of reversion [96]                                           | Exchange of genetic information with other vaccine or wild-type strains and consequent safety implications |
|                                                                          | Ability to differentiate infected from vaccinated animals (DIVA) [95,97] |                                                                                                            |
|                                                                          | Loss of pathogenicity [98]                                               |                                                                                                            |

doi:10.1371/journal.pntd.0004572.t002

susceptible to reversion to wild-type virulence. Knowledge of the genetic basis of attenuation is key to understanding the mode of action of the developed vaccines. Hence, other approaches have been pursued that involve prior identification of virulence genes followed by the induction of targeted mutations.

Exposure of microorganisms to irradiation [78,99] or other conditions, including low temperature [100] and chemicals [101], can be used to induce attenuating chromosomal mutations for the purpose of developing LAVs. *B. abortus* strain 19 (S19), for example, is a smooth strain that became attenuated during prolonged cultivation under dehydrating conditions [102]. The molecular basis for the attenuation of S19 is not yet known. However, studies have demonstrated that S19 harbors mutations in 24 virulence-associated genes [103], including genes encoding an outer membrane protein and three proteins involved in erythritol uptake or metabolism [103]. Irradiation can also be used to generate organisms displaying reduced replicative capacity *in vivo* while preserving metabolic and transcriptional activity [78,104], an ability to persist in macrophages [78], and the capacity to confer protection to mice against virulent bacterial challenge [78]. More recent high-throughput approaches for generating and screening banks of mutant bacteria include the transposon-site hybridization (TraSH) system [105] and RNA-guided gene editing using clustered regularly interspaced short palindromic repeat-CRISPR-associated protein (CRISPR-Cas) technology [106]. The application of these approaches for LAV generation constitutes an exciting area of future investigation.

Transposon-mediated mutagenesis by random gene inactivation has been used to identify virulence factors and construct mutations in *Brucella* [107,108] and *M. bovis* [109,110]. This approach in *M. bovis* yielded mutants with similar efficacy to BCG in a guinea pig model of tuberculosis [111]. In *Brucella* spp., this strategy led to the mutation and identification of several virulence genes [112]. For example, strains harboring mutations in VjbR, a quorum sensing-related transcriptional regulator [108,113], were demonstrated to be potential vaccine candidates based on significant reductions in virulence revealed in *in vitro* and *in vivo* models of *Brucella* infection [22,33,114]. Transcriptomics may also enable the identification of virulence genes. Similarly, protein arrays have been used to identify surface-localized immunogenic proteins [115]. This strategy involves screening protein arrays using sera from vaccinated or infected animals to identify target vaccine antigens. Sera from infected or convalescent patients have also been used to screen protein arrays containing pathogen proteins to characterize rates of infection and identify bacterial antigens [44]. Following identification of loci of interest, targeted gene mutations can be introduced at these loci using conventional bacterial gene targeting approaches [85] or gene editing technology [106]. Finally, the mutated strains can be tested for virulence (i.e., safety) and for the ability to confer protection against challenge with virulent organisms (i.e., efficacy).

## Recent Progress in the Development of New *Brucella* Vaccines

Various vaccine modalities, including DNA, protein, viral vector, and live attenuated vaccines, have been developed for protecting animals or humans from brucellosis [74,76]. For example, several protective antigens for brucellosis, formulated either as DNA or purified proteins, have been tested in murine models under various challenge regimes. These antigens include several outer membrane proteins (OMPs) [116–118], DnaK and SurA [119], and lumazine synthase [120]. Moreover, live vaccine vectors (e.g., *Salmonella enterica* serovar Typhimurium) that express heterologous *Brucella* protective antigens (e.g., L7/L12 and lumazine fusion protein) have been tested [121]. Vaccinia virus [122] or Semliki Forest virus [12,123] vectors have also been used to deliver the *Brucella* vaccine antigens L7/L12 [122], SodC [123], or translation initiation factor [12] with the aim of eliciting protective responses in murine models of *Brucella*

challenge. However, only modest protection, which was lower than reported for the LAVs RB51 or S19, was observed in these studies.

While an effective subunit vaccine for *Brucella* has yet to be developed, several LAV formulations show promise. Although efficacy has been demonstrated in bovine populations with S19, this vaccine can induce abortion in pregnant animals [124]. It can also cause disease in humans as a result of secondary exposure and is thus considered to be unsafe for use in humans. The vaccine strain RB51, which is used in cattle, and Rev.1, which is used in sheep and goats, can induce abortion in pregnant animals [75,125] or infect humans [126]. The search for improved LAVs against brucellosis has relied upon advances in our understanding of *Brucella* virulence determinants and the role of individual genes in the survival and virulence of the pathogen in vitro and in vivo. Collectively, this work has provided opportunities to build upon the merits of the LAV approach by using rational bioengineering of strains for the generation of attenuated agents that harbor deletions of key genes that are essential for virulence yet maintain efficacy in vaccine challenge experiments. However, it is often easier said than done with *Brucella* spp., as well as with other bacterial pathogens, which unlike their viral counterparts have larger genomes and greater genetic complexities that require defining strains with levels of attenuation that ensure both safety and protection. Continued efforts in our labs to develop attenuated *Brucella* mutants as vaccine candidates have yielded promising candidates, including  $\Delta mucR$  [28],  $\Delta asp24$  [127], and  $\Delta vjbR$  mutants [33]. *B. melitensis*  $\Delta vjbR$  strains were shown to be defective for survival within macrophages and rapidly cleared from the spleen in BALB/c mice [33]. The safety of the  $\Delta vjbR$  strains was further revealed by the absence of splenomegaly in inoculated mice [22]. Even at 2 weeks, when the bacterial load in the spleen was high, the mean spleen weights in Bm $\Delta vjbR$  mice were 5-fold less than wild-type controls [33,128]. Remarkably, neither lethality nor osteoarticular disease was observed in severely immunodeficient interferon regulatory transcription factor 1 (IRF1) mice [114]. Therefore, the vaccine displayed unprecedented safety in preclinical animal trials. In contrast, the currently available animal vaccine strains S19 and Rev.1 induce splenomegaly in mice, an undesirable side effect for human vaccination [22,33]. Differences in survival and inflammatory responses exhibited by *B. melitensis*  $\Delta vjbR$  strains are promising and warrant further evaluation in large animal and nonhuman primate models to develop an improved vaccine candidate for possible human use. In addition, an expanded analysis of delivery systems, including encapsulation of *B. melitensis*  $\Delta vjbR$  or other LAV strains, is recommended [33]. For example, a recent study evaluated the protective and immunogenic potential of an alginate-encapsulated live attenuated *B. ovis*  $\Delta abcBA$  vaccine [35]. Remarkably, this vaccine formulation prevented infection, bacterial shedding, and development of clinical changes and pathogenic lesions following challenge with wild-type *B. ovis* in rams [35]. An in vitro evaluation of the  $\Delta abcBA$  strain in ovine monocyte-derived macrophages revealed defects in intracellular multiplication, trafficking, and *Brucella*-containing vacuole (BCV) maturation compared to wild-type infection [129]. Therefore, evaluation of candidate LAVs with alternative delivery systems and vaccine regimens (including dose and route) can potentially lead to LAVs with better efficacy and safety.

## Recent Developments with BTb Vaccines

The application of vaccines to address BTb has benefitted significantly from recent advances in vaccines for human TB. Live mycobacterial vaccines to replace BCG and subunit vaccines (virus vector or protein) to boost BCG have been tested. To date, field trials have demonstrated that BCG vaccination can protect cattle from natural exposure to *M. bovis* [130]. Similarly, calves vaccinated with novel *M. bovis* auxotrophs displayed reduced bacterial burden and pathology following challenge with virulent *M. bovis*. These data confirm the efficacy of LAVs

in preventing infection with this pathogen. In contrast, subunit vaccine antigens, when delivered alone, have generally proven to be less efficacious than BCG in conferring protection to cattle from *M. bovis* (for review, see [73]). Moreover, culture filtrate proteins (CFP) from *M. bovis* [131] and DNA vaccines encoding *M. bovis* proteins have failed to provide similar levels of protection in cattle as BCG [132]. However, prime-boost combinations of BCG with DNA [133] or virus-vectored vaccines [134,135] have induced better protection than BCG vaccine alone, thereby demonstrating the utility of protective antigens in enhancing the immune protection initiated by LAVs [136]. In one example, boosting BCG vaccination with replication-deficient virus vectors encoding Ag85A induced strong cellular immunity, elevated interferon gamma (IFN- $\gamma$ ) responses, and enhanced protection with reduced pathogen loads following *M. bovis* challenge [134]. BCG strains overexpressing mycobacterial antigens may also be used as a delivery platform to increase vaccination efficacy in murine and guinea pig models [137]. Similarly, expression of the bacterial antigens *sodC* and *wboA* enhanced protection of *Brucella* RB51 vaccination against *B. suis* 1330 challenge [138,139]. Therefore, protective antigens can play an important role in prime-boost vaccination strategies.

Sequence analysis of BCG has provided information that can be exploited to develop novel candidate LAVs. For example, mutation of chromosomal regions of difference 1 (RD1) at the *cfp10-esat6* locus is responsible for loss of virulence [140]. *M. bovis*  $\Delta$ RD1 displayed a reduced number and severity of TB lesions as well as reduced bacterial burden in BCG vaccinates [36]. Another *M. bovis* mutant,  $\Delta$ *mce2*, exhibited greater immunological reactivity in response to tuberculin purified protein derivative (PPD) than BCG vaccinates [141]. Therefore, these strains may constitute potential vaccine candidates.

Although *B. melitensis* strains harboring mutations in the LuxR family member  $\Delta$ *vjbR* have exhibited promise as LAVs for reducing brucellosis [22,114], similar targeting of this class of proteins in the development of BTb LAVs has not yet been thoroughly explored. Just recently, *Mtb* strains harboring deletions in the LuxR family transcription factor gene, Rv0195, of *M. tuberculosis* strain H37Rv were shown to decrease cell survival under hypoxic and reductive stress triggered by vitamin C [142]. Furthermore, Rv0195 deletion diminished bacterial virulence in human macrophage-like cells and resulted in reduced bacterial survival and pathogenicity in a C57BL/6 mouse infection model [142]. These studies raise the intriguing possibility that *M. bovis* strains harboring deletions in LuxR family members may provide a useful framework for the development of LAVs to address *M. bovis* infection.

## Perspective and Future Directions

As a result of their ability to elicit protective immune responses, LAVs against bacteria may represent a superior alternative to subunit, killed, or DNA vaccines. Although subunit vaccines have an advantage in perceived safety over live attenuated organisms, including viruses, their inability to penetrate deep lymphoid tissue results in a weak immune response lacking recall and frequently requiring the addition of toxic immune stimulants or attenuated vectors for delivery [143,144]. Additionally, bacteria and parasites engage multiple host factors and virulence mechanisms to invade cells or to evade or resist immune clearance. Using modern recombinant techniques, it is possible to irreversibly, temporally, or spatially attenuate the survival and/or transmissibility of some bacteria without restricting their immune potential. The one concern that prevents complete acceptance of LAVs is the potential for reversion to virulence, a concern fostered by the use of spontaneously occurring variants without knowledge of the extent of the genetic lesion, if any. In contrast to the use of such variants, modern techniques provide the opportunity to identify and remove species-defining genetic loci that are

neither readily reacquired nor restore appropriate function. In addition, multiple loci may be removed, reducing the chance of reversion to infinitesimal levels.

We have argued that LAVs provide a compelling technology to control the neglected zoonotic diseases brucellosis and BTb; this is because of the better immune response they engender and a history of past successes in disease eradication [145]. We note, however, that LAV development across genera is not without potential disadvantages. For example, if the pathogen exerts significant immunomodulatory effects on the host, then the vaccine may also modulate aspects of the immune response and prevent the expression of resistance. Prior immunological exposure to a cross-reactive infectious or environmental agent may render the LAV ineffective because the vaccinating infection is terminated prematurely. LAVs may also raise safety concerns for immunocompromised individuals, which may preclude their use. The use of BCG in infants at risk of HIV exposure provides a salient example [146]. The removal of antibiotic resistance cassettes used for selection of targeted mutations in vaccine strains may be technically challenging in some organisms, which constitutes a potential impediment to licensure. Finally, the dependence of LAVs on a reliable cold chain may create challenges for delivery in resource-poor settings where neglected zoonotic diseases can ravage animal and human populations.

There are many exciting avenues for future research and testing of LAV vaccines. For example, the analyses of prime-boost strategies that pair promising *Brucella* subunit vaccines with corresponding candidate LAVs remain in their infancy. Efforts to genetically engineer a multivalent or universal *Brucella* vaccine that affords potent cross protection also constitutes an exciting area of future research. The development of encapsulation technologies to enhance the stability and reduce the requirement of cold chain storage for LAVs may also transform the feasibility of large-scale vaccination efforts [33,147]. Engineering LAVs to protect against multiple pathogens, including *M. bovis* and *Brucella*, provides an exciting avenue of future investigation. Finally, new advances in genetics, bioinformatics, and pharmaceutical technology may provide avenues for addressing these challenges and thereby promote development of next-generation vaccines for addressing neglected zoonotic diseases of global consequence.

### Key Learning Points

- LAVs against brucellosis and Btb display greater efficacy and/or safety in various model systems than competing subunit vaccine platforms against these diseases.
- Some candidate *Brucella* LAVs have demonstrated excellent efficacy and safety in pre-clinical studies.
- The potential for reversion to virulence of LAVs has been partly addressed by the use of modern techniques that remove species-defining genetic loci that are neither readily reacquired nor restore function, and the removal of multiple loci reduces the risk of reversion to infinitesimal levels.
- Evaluation of prime-boost strategies, a multivalent or universal *Brucella* vaccine, encapsulation technologies to deliver *Brucella* LAVs, and engineering LAVs to protect against multiple pathogens, including *M. bovis* and *Brucella*, provides exciting avenues of future investigation.
- High-throughput approaches for generating and screening banks of mutant bacteria, including the TraSH system and RNA-guided gene editing using CRISPR-Cas technology, provide exciting areas for future investigation.



## Top Five Papers in the Field

1. Arenas-Gamboa AM, Ficht TA, Kahl-McDonagh MM, Gomez G, Rice-Ficht AC. The *Brucella abortus* S19  $\Delta yj b R$  live vaccine candidate is safer than S19 and confers protection against wild-type challenge in BALB/c mice when delivered in a sustained-release vehicle. *Infect Immun*. 2009;77(2): 877–84.
2. Silva APC, Macêdo AA, Costa LF, Rocha CE, Garcia LNN, Farias JRD, et al. Encapsulated *Brucella ovis* lacking a putative ATP-binding cassette transporter ( $\Delta abcBA$ ) protects against wild type *Brucella ovis* in rams. *PLoS ONE*. 2015;10(8): e0136865.
3. Vemulapalli R, He Y, Buccolo LS, Boyle SM, Sriranganathan N, Schurig GG. Complementation of *Brucella abortus* RB51 with a functional *wboA* Gene results in O-antigen synthesis and enhanced vaccine efficacy but no change in rough phenotype and attenuation. *Infect Immun*. 2000;68(7): 3927–32.
4. Pym AS, Brodin P, Brosch R, Huerre M, Cole ST. Loss of RD1 contributed to the attenuation of the live tuberculosis vaccines *Mycobacterium bovis* BCG and *Mycobacterium microti*. *Mol Microbiol*. 2002;46(3):709–17.
5. Skinner MA, Ramsay AJ, Buchan GS, Keen DL, Ranasinghe C, Slobbe L, et al. A DNA prime-live vaccine boost strategy in mice can augment IFN- $\gamma$  responses to mycobacterial antigens but does not increase the protective efficacy of two attenuated strains of *Mycobacterium bovis* against bovine tuberculosis. *Immunology*. 2003;108(4):548–55.

## References

1. Lee NH, Lee JA, Park SY, Song CS, Choi IS, et al. (2012) A review of vaccine development and research for industry animals in Korea. *Clin Exp Vaccine Res* 1: 18–34. doi: [10.7774/cevr.2012.1.1.18](https://doi.org/10.7774/cevr.2012.1.1.18) PMID: [23596575](https://pubmed.ncbi.nlm.nih.gov/23596575/)
2. Enright FM, Araya LN, Elzer PH, Rowe GE, Winter AJ (1990) Comparative histopathology in BALB/c mice infected with virulent and attenuated strains of *Brucella abortus*. *Vet Immunol Immunopathol* 26: 171–182. PMID: [2124401](https://pubmed.ncbi.nlm.nih.gov/2124401/)
3. Ficht TA, Kahl-McDonagh MM, Arenas-Gamboa AM, Rice-Ficht AC (2009) Brucellosis: the case for live, attenuated vaccines. *Vaccine* 27 Suppl 4: D40–43. doi: [10.1016/j.vaccine.2009.08.058](https://doi.org/10.1016/j.vaccine.2009.08.058) PMID: [19837284](https://pubmed.ncbi.nlm.nih.gov/19837284/)
4. Mangtani P, Abubakar I, Ariti C, Beynon R, Pimpin L, et al. (2014) Protection by BCG vaccine against tuberculosis: a systematic review of randomized controlled trials. *Clin Infect Dis* 58: 470–480. doi: [10.1093/cid/cit790](https://doi.org/10.1093/cid/cit790) PMID: [24336911](https://pubmed.ncbi.nlm.nih.gov/24336911/)
5. (1980) Live attenuated measles vaccine. *EPI NewsI* 2: 6. PMID: [12314356](https://pubmed.ncbi.nlm.nih.gov/12314356/)
6. Bernstein DI, Sack DA, Rothstein E, Reisinger K, Smith VE, et al. (1999) Efficacy of live, attenuated, human rotavirus vaccine 89–12 in infants: a randomised placebo-controlled trial. *Lancet* 354: 287–290. PMID: [10440305](https://pubmed.ncbi.nlm.nih.gov/10440305/)
7. Linhares AC, Velazquez FR, Perez-Schael I, Saez-Llorens X, Abate H, et al. (2008) Efficacy and safety of an oral live attenuated human rotavirus vaccine against rotavirus gastroenteritis during the first 2 years of life in Latin American infants: a randomised, double-blind, placebo-controlled phase III study. *Lancet* 371: 1181–1189. doi: [10.1016/S0140-6736\(08\)60524-3](https://doi.org/10.1016/S0140-6736(08)60524-3) PMID: [18395579](https://pubmed.ncbi.nlm.nih.gov/18395579/)
8. Jain S, Afley P, Dohre SK, Saxena N, Kumar S (2014) Evaluation of immunogenicity and protective efficacy of a plasmid DNA vaccine encoding ribosomal protein L9 of *Brucella abortus* in BALB/c mice. *Vaccine* 32: 4537–4542. doi: [10.1016/j.vaccine.2014.06.012](https://doi.org/10.1016/j.vaccine.2014.06.012) PMID: [24950353](https://pubmed.ncbi.nlm.nih.gov/24950353/)
9. Ghasemi A, Jeddi-Tehrani M, Mautner J, Salari MH, Zarnani AH (2014) Immunization of mice with a novel recombinant molecular chaperon confers protection against *Brucella melitensis* infection. *Vaccine* 32: 6659–6666. doi: [10.1016/j.vaccine.2014.09.013](https://doi.org/10.1016/j.vaccine.2014.09.013) PMID: [25240754](https://pubmed.ncbi.nlm.nih.gov/25240754/)

10. Goel D, Rajendran V, Ghosh PC, Bhatnagar R (2013) Cell mediated immune response after challenge in Omp25 liposome immunized mice contributes to protection against virulent *Brucella abortus* 544. *Vaccine* 31: 1231–1237. doi: [10.1016/j.vaccine.2012.12.043](https://doi.org/10.1016/j.vaccine.2012.12.043) PMID: [23273966](https://pubmed.ncbi.nlm.nih.gov/23273966/)
11. Fu S, Xu J, Li X, Xie Y, Qiu Y, et al. (2012) Immunization of mice with recombinant protein CobB or AsnC confers protection against *Brucella abortus* infection. *PLoS ONE* 7: e29552. doi: [10.1371/journal.pone.0029552](https://doi.org/10.1371/journal.pone.0029552) PMID: [22383953](https://pubmed.ncbi.nlm.nih.gov/22383953/)
12. Cabrera A, Saez D, Cespedes S, Andrews E, Onate A (2009) Vaccination with recombinant Semliki Forest virus particles expressing translation initiation factor 3 of *Brucella abortus* induces protective immunity in BALB/c mice. *Immunobiology* 214: 467–474. doi: [10.1016/j.imbio.2008.11.016](https://doi.org/10.1016/j.imbio.2008.11.016) PMID: [19150742](https://pubmed.ncbi.nlm.nih.gov/19150742/)
13. Mableson HE, Okello A, Picozzi K, Welburn SC (2014) Neglected zoonotic diseases—the long and winding road to advocacy. *PLoS Negl Trop Dis* 8: e2800. doi: [10.1371/journal.pntd.0002800](https://doi.org/10.1371/journal.pntd.0002800) PMID: [24901769](https://pubmed.ncbi.nlm.nih.gov/24901769/)
14. WHO (2006) The control of neglected zoonotic diseases: A route to poverty alleviation. Report of a joint WHO/DFID-AHP Meeting; WHO Headquarters Geneva Switzerland 20–21.
15. Fiorentino MA, Campos E, Cravero S, Arese A, Paolicchi F, et al. (2008) Protection levels in vaccinated heifers with experimental vaccines *Brucella abortus* M1-luc and INTA 2. *Vet Microbiol* 132: 302–311. doi: [10.1016/j.vetmic.2008.05.003](https://doi.org/10.1016/j.vetmic.2008.05.003) PMID: [18565697](https://pubmed.ncbi.nlm.nih.gov/18565697/)
16. Tibor A, Jacques I, Guilloteau L, Verger JM, Grayon M, et al. (1998) Effect of P39 gene deletion in live *Brucella* vaccine strains on residual virulence and protective activity in mice. *Infect Immun* 66: 5561–5564. PMID: [9784574](https://pubmed.ncbi.nlm.nih.gov/9784574/)
17. Trant CG, Lacerda TL, Carvalho NB, Azevedo V, Rosinha GM, et al. (2010) The *Brucella abortus* phosphoglycerate kinase mutant is highly attenuated and induces protection superior to that of vaccine strain 19 in immunocompromised and immunocompetent mice. *Infect Immun* 78: 2283–2291. doi: [10.1128/IAI.01433-09](https://doi.org/10.1128/IAI.01433-09) PMID: [20194591](https://pubmed.ncbi.nlm.nih.gov/20194591/)
18. Ugalde JE, Comerci DJ, Leguizamon MS, Ugalde RA (2003) Evaluation of *Brucella abortus* phosphoglucomutase (pgm) mutant as a new live rough-phenotype vaccine. *Infect Immun* 71: 6264–6269. PMID: [14573645](https://pubmed.ncbi.nlm.nih.gov/14573645/)
19. Poester FP, Goncalves VS, Paixao TA, Santos RL, Olsen SC, et al. (2006) Efficacy of strain RB51 vaccine in heifers against experimental brucellosis. *Vaccine* 24: 5327–5334. PMID: [16713034](https://pubmed.ncbi.nlm.nih.gov/16713034/)
20. Davis DS, Templeton JW, Ficht TA, Williams JD, Kopec JD, et al. (1990) *Brucella abortus* in captive bison. I. Serology, bacteriology, pathogenesis, and transmission to cattle. *J Wildl Dis* 26: 360–371. PMID: [2117675](https://pubmed.ncbi.nlm.nih.gov/2117675/)
21. Confer AW, Hall SM, Espe BH (1985) Transient enhancement of the serum antibody response to *Brucella abortus* strain 19 in cattle treated with levamisole. *Am J Vet Res* 46: 2440–2443. PMID: [3936383](https://pubmed.ncbi.nlm.nih.gov/3936383/)
22. Arenas-Gamboa AM, Ficht TA, Kahl-McDonagh MM, Gomez G, Rice-Ficht AC (2009) The *Brucella abortus* S19 DeltavjbR live vaccine candidate is safer than S19 and confers protection against wild-type challenge in BALB/c mice when delivered in a sustained-release vehicle. *Infect Immun* 77: 877–884. doi: [10.1128/IAI.01017-08](https://doi.org/10.1128/IAI.01017-08) PMID: [19047401](https://pubmed.ncbi.nlm.nih.gov/19047401/)
23. Lacerda TL, Cardoso PG, Augusto de Almeida L, Camargo IL, Afonso DA, et al. (2010) Inactivation of formyltransferase (wbkC) gene generates a *Brucella abortus* rough strain that is attenuated in macrophages and in mice. *Vaccine* 28: 5627–5634. doi: [10.1016/j.vaccine.2010.06.023](https://doi.org/10.1016/j.vaccine.2010.06.023) PMID: [20580469](https://pubmed.ncbi.nlm.nih.gov/20580469/)
24. Yang X, Becker T, Walters N, Pascual DW (2006) Deletion of *znuA* virulence factor attenuates *Brucella abortus* and confers protection against wild-type challenge. *Infect Immun* 74: 3874–3879. PMID: [16790759](https://pubmed.ncbi.nlm.nih.gov/16790759/)
25. Kahl-McDonagh MM, Elzer PH, Hagius SD, Walker JV, Perry QL, et al. (2006) Evaluation of novel *Brucella melitensis* unmarked deletion mutants for safety and efficacy in the goat model of brucellosis. *Vaccine* 24: 5169–5177. PMID: [16697090](https://pubmed.ncbi.nlm.nih.gov/16697090/)
26. Grillo MJ, Marin CM, Barberan M, de Miguel MJ, Laroucau K, et al. (2009) Efficacy of bp26 and bp26/omp31 *B. melitensis* Rev.1 deletion mutants against *Brucella ovis* in rams. *Vaccine* 27: 187–191. doi: [10.1016/j.vaccine.2008.10.065](https://doi.org/10.1016/j.vaccine.2008.10.065) PMID: [19007836](https://pubmed.ncbi.nlm.nih.gov/19007836/)
27. Phillips RW, Elzer PH, Robertson GT, Hagius SD, Walker JV, et al. (1997) A *Brucella melitensis* high-temperature-requirement A (*htrA*) deletion mutant is attenuated in goats and protects against abortion. *Res Vet Sci* 63: 165–167. PMID: [9429252](https://pubmed.ncbi.nlm.nih.gov/9429252/)
28. Arenas-Gamboa AM, Rice-Ficht AC, Kahl-McDonagh MM, Ficht TA (2011) Protective efficacy and safety of *Brucella melitensis* 16MDeltamucR against intraperitoneal and aerosol challenge in BALB/c mice. *Infect Immun* 79: 3653–3658. doi: [10.1128/IAI.05330-11](https://doi.org/10.1128/IAI.05330-11) PMID: [21708998](https://pubmed.ncbi.nlm.nih.gov/21708998/)

29. Edmonds MD, Cloeckeaert A, Elzer PH (2002) Brucella species lacking the major outer membrane protein Omp25 are attenuated in mice and protect against Brucella melitensis and Brucella ovis. *Vet Microbiol* 88: 205–221. PMID: [12151196](#)
30. Barrio MB, Grillo MJ, Munoz PM, Jacques I, Gonzalez D, et al. (2009) Rough mutants defective in core and O-polysaccharide synthesis and export induce antibodies reacting in an indirect ELISA with smooth lipopolysaccharide and are less effective than Rev 1 vaccine against Brucella melitensis infection of sheep. *Vaccine* 27: 1741–1749. doi: [10.1016/j.vaccine.2009.01.025](#) PMID: [19186196](#)
31. Izadjoo MJ, Bhattacharjee AK, Paronavitana CM, Hadfield TL, Hoover DL (2004) Oral vaccination with Brucella melitensis WR201 protects mice against intranasal challenge with virulent Brucella melitensis 16M. *Infect Immun* 72: 4031–4039. PMID: [15213148](#)
32. Alton GG (1966) Duration of the immunity produced in goats by the Rev. 1 Brucella melitensis vaccine. *J Comp Pathol* 76: 241–253. PMID: [6007463](#)
33. Arenas-Gamboa AM, Ficht TA, Kahl-McDonagh MM, Rice-Ficht AC (2008) Immunization with a single dose of a microencapsulated Brucella melitensis mutant enhances protection against wild-type challenge. *Infect Immun* 76: 2448–2455. doi: [10.1128/IAI.00767-07](#) PMID: [18362129](#)
34. Elzer PH, Enright FM, McQuiston JR, Boyle SM, Schurig GG (1998) Evaluation of a rough mutant of Brucella melitensis in pregnant goats. *Res Vet Sci* 64: 259–260. PMID: [9690613](#)
35. Silva AP, Macedo AA, Costa LF, Rocha CE, Garcia LN, et al. (2015) Encapsulated Brucella ovis Lacking a Putative ATP-Binding Cassette Transporter (DeltaabcBA) Protects against Wild Type Brucella ovis in Rams. *PLoS ONE* 10: e0136865. doi: [10.1371/journal.pone.0136865](#) PMID: [26317399](#)
36. Waters WR, Palmer MV, Nonnecke BJ, Thacker TC, Scherer CF, et al. (2009) Efficacy and immunogenicity of Mycobacterium bovis DeltaRD1 against aerosol M. bovis infection in neonatal calves. *Vaccine* 27: 1201–1209. doi: [10.1016/j.vaccine.2008.12.018](#) PMID: [19135497](#)
37. Khare S, Hondalus MK, Nunes J, Bloom BR, Garry Adams L (2007) Mycobacterium bovis DeltaleuD auxotroph-induced protective immunity against tissue colonization, burden and distribution in cattle intranasally challenged with Mycobacterium bovis Ravenel S. *Vaccine* 25: 1743–1755. PMID: [17240005](#)
38. Blanco FC, Soria M, Gravisaco MJ, Bianco MV, Meikle V, et al. (2012) Assessment of the immune responses induced in cattle after inoculation of a Mycobacterium bovis strain deleted in two mce2 genes. *J Biomed Biotechnol* 2012: 258353. doi: [10.1155/2012/258353](#) PMID: [22719207](#)
39. Bianco MV, Clark S, Blanco FC, Garbaccio S, Garcia E, et al. (2014) Assessment of Mycobacterium bovis deleted in p27-p55 virulence operon as candidate vaccine against tuberculosis in animal models. *Biomed Res Int* 2014: 951978. doi: [10.1155/2014/951978](#) PMID: [24588000](#)
40. Pappas G, Papadimitriou P, Akritidis N, Christou L, Tsianos EV (2006) The new global map of human brucellosis. *Lancet Infect Dis* 6: 91–99. PMID: [16439329](#)
41. Pappas G (2010) The changing Brucella ecology: novel reservoirs, new threats. *Int J Antimicrob Agents* 36 Suppl 1: S8–11. doi: [10.1016/j.ijantimicag.2010.06.013](#) PMID: [20696557](#)
42. McDermott JJ, Arimi SM (2002) Brucellosis in sub-Saharan Africa: epidemiology, control and impact. *Vet Microbiol* 90: 111–134. PMID: [12414138](#)
43. Ducrotoy MJ, Bertu WJ, Ocholi RA, Gusi AM, Bryssinckx W, et al. (2014) Brucellosis as an emerging threat in developing economies: lessons from Nigeria. *PLoS Negl Trop Dis* 8: e3008. doi: [10.1371/journal.pntd.0003008](#) PMID: [25058178](#)
44. Angel MO, Ristow P, Ko AI, Di-Lorenzo C (2012) Serological trail of Brucella infection in an urban slum population in Brazil. *J Infect Dev Ctries* 6: 675–679. doi: [10.3855/jidc.2347](#) PMID: [23000868](#)
45. Islam MA, Khatun MM, Werre SR, Sriranganathan N, Boyle SM (2013) A review of Brucella seroprevalence among humans and animals in Bangladesh with special emphasis on epidemiology, risk factors and control opportunities. *Vet Microbiol* 166: 317–326. doi: [10.1016/j.vetmic.2013.06.014](#) PMID: [23867082](#)
46. Dean AS, Crump L, Greter H, Schelling E, Zinsstag J (2012) Global burden of human brucellosis: a systematic review of disease frequency. *PLoS Negl Trop Dis* 6: e1865. doi: [10.1371/journal.pntd.0001865](#) PMID: [23145195](#)
47. McDermott J, Grace D, Zinsstag J (2013) Economics of brucellosis impact and control in low-income countries. *Rev Sci Tech* 32: 249–261. PMID: [23837382](#)
48. Dean AS, Crump L, Greter H, Hattendorf J, Schelling E, et al. (2012) Clinical manifestations of human brucellosis: a systematic review and meta-analysis. *PLoS Negl Trop Dis* 6: e1929. doi: [10.1371/journal.pntd.0001929](#) PMID: [23236528](#)
49. Kim S, Lee DS, Watanabe K, Furuoka H, Suzuki H, et al. (2005) Interferon-gamma promotes abortion due to Brucella infection in pregnant mice. *BMC Microbiol* 5: 22. PMID: [15869716](#)

50. Godfroid J, Saegerman C, Wellemans V, Walravens K, Letesson JJ, et al. (2002) How to substantiate eradication of bovine brucellosis when aspecific serological reactions occur in the course of brucellosis testing. *Vet Microbiol* 90: 461–477. PMID: [12414165](#)
51. Hotez PJ, Gurwith M (2011) Europe's neglected infections of poverty. *Int J Infect Dis* 15: e611–619. doi: [10.1016/j.ijid.2011.05.006](#) PMID: [21763173](#)
52. Kumar A (2010) Brucellosis: need of public health intervention in rural India. *Prilozi* 31: 219–231. PMID: [20703194](#)
53. Ariza J, Bosilkovski M, Cascio A, Colmenero JD, Corbel MJ, et al. (2007) Perspectives for the treatment of brucellosis in the 21st century: the Ioannina recommendations. *PLoS Med* 4: e317. PMID: [18162038](#)
54. Fitzgerald SD, Kaneene JB (2013) Wildlife reservoirs of bovine tuberculosis worldwide: hosts, pathology, surveillance, and control. *Vet Pathol* 50: 488–499. doi: [10.1177/0300985812467472](#) PMID: [23169912](#)
55. A C, C G (1909) *C R Acad Sci* 149: 716–718.
56. JH S (1995) Regional and Country Status Report. In: Steele JH, Thoene C, editors. *Mycobacterium bovis Infection in Animals and Humans*. Ames, IA: Iowa Press. pp. 169–172.
57. Torgerson PR, Torgerson DJ (2010) Public health and bovine tuberculosis: what's all the fuss about? *Trends Microbiol* 18: 67–72. doi: [10.1016/j.tim.2009.11.002](#) PMID: [19944609](#)
58. Scorpio A, Zhang Y (1996) Mutations in *pncA*, a gene encoding pyrazinamidase/nicotinamidase, cause resistance to the antituberculous drug pyrazinamide in tubercle bacillus. *Nat Med* 2: 662–667. PMID: [8640557](#)
59. Cousins DV (2001) *Mycobacterium bovis* infection and control in domestic livestock. *Rev Sci Tech* 20: 71–85. PMID: [11288521](#)
60. O'Brien D J, Schmitt SM, Fitzgerald SD, Berry DE, Hickling GJ (2006) Managing the wildlife reservoir of *Mycobacterium bovis*: the Michigan, USA, experience. *Vet Microbiol* 112: 313–323. PMID: [16376030](#)
61. Barquero-Calvo E, Chaves-Olarte E, Weiss DS, Guzman-Verri C, Chacon-Diaz C, et al. (2007) *Brucella abortus* uses a stealthy strategy to avoid activation of the innate immune system during the onset of infection. *PLoS ONE* 2: e631. PMID: [17637846](#)
62. Ben-Tekaya H, Gorvel JP, Dehio C (2013) Bartonella and Brucella—weapons and strategies for stealth attack. *Cold Spring Harb Perspect Med* 3.
63. de Jong MF, Rolan HG, Tsois RM (2010) Innate immune encounters of the (Type) 4th kind: Brucella. *Cell Microbiol* 12: 1195–1202. doi: [10.1111/j.1462-5822.2010.01498.x](#) PMID: [20670294](#)
64. Koh KW, Lehming N, Seah GT (2009) Degradation-resistant protein domains limit host cell processing and immune detection of mycobacteria. *Mol Immunol* 46: 1312–1318. doi: [10.1016/j.molimm.2008.11.008](#) PMID: [19128836](#)
65. Liu H, Jiang Y, Dou X, Wang H, Zhao X, et al. (2013) *pstS1* polymorphisms of *Mycobacterium tuberculosis* strains may reflect ongoing immune evasion. *Tuberculosis (Edinb)* 93: 475–481.
66. de Figueiredo P, Ficht TA, Rice-Ficht A, Rossetti CA, Adams LG (2015) Pathogenesis and immunobiology of brucellosis: review of *Brucella*-host interactions. *Am J Pathol* 185: 1505–1517. doi: [10.1016/j.ajpath.2015.03.003](#) PMID: [25892682](#)
67. Case ED, Smith JA, Ficht TA, Samuel JE, de Figueiredo P (2016) Space: A Final Frontier for Vacuolar Pathogens. *Traffic* 17: 461–474. doi: [10.1111/tra.12382](#) PMID: [26842840](#)
68. Criscitiello MF, Dickman MB, Samuel JE, de Figueiredo P (2013) Tripping on acid: trans-kingdom perspectives on biological acids in immunity and pathogenesis. *PLoS Pathog* 9: e1003402. doi: [10.1371/journal.ppat.1003402](#) PMID: [23874196](#)
69. Qin QM, Pei J, Ancona V, Shaw BD, Ficht TA, et al. (2008) RNAi screen of endoplasmic reticulum-associated host factors reveals a role for IRE1alpha in supporting *Brucella* replication. *PLoS Pathog* 4: e1000110. doi: [10.1371/journal.ppat.1000110](#) PMID: [18654626](#)
70. Criscitiello MF, de Figueiredo P (2013) Fifty shades of immune defense. *PLoS Pathog* 9: e1003110. doi: [10.1371/journal.ppat.1003110](#) PMID: [23408882](#)
71. Herbst S, Schaible UE, Schneider BE (2011) Interferon gamma activated macrophages kill mycobacteria by nitric oxide induced apoptosis. *PLoS ONE* 6: e19105. doi: [10.1371/journal.pone.0019105](#) PMID: [21559306](#)
72. Buddle BM, Wedlock DN, Denis M, Vordermeier HM, Hewinson RG (2011) Update on vaccination of cattle and wildlife populations against tuberculosis. *Vet Microbiol* 151: 14–22. doi: [10.1016/j.vetmic.2011.02.021](#) PMID: [21420804](#)

73. Buddle BM, Parlane NA, Wedlock DN, Heiser A (2013) Overview of vaccination trials for control of tuberculosis in cattle, wildlife and humans. *Transbound Emerg Dis* 60 Suppl 1: 136–146. doi: [10.1111/tbed.12092](https://doi.org/10.1111/tbed.12092) PMID: [24171859](https://pubmed.ncbi.nlm.nih.gov/24171859/)
74. Wang Z, Wu Q (2013) Research progress in live attenuated Brucella vaccine development. *Curr Pharm Biotechnol* 14: 887–896. PMID: [24372253](https://pubmed.ncbi.nlm.nih.gov/24372253/)
75. Avila-Calderon ED, Lopez-Merino A, Sriranganathan N, Boyle SM, Contreras-Rodriguez A (2013) A history of the development of Brucella vaccines. *Biomed Res Int* 2013: 743509. doi: [10.1155/2013/743509](https://doi.org/10.1155/2013/743509) PMID: [23862154](https://pubmed.ncbi.nlm.nih.gov/23862154/)
76. Yang X, Skyberg JA, Cao L, Clapp B, Thornburg T, et al. (2013) Progress in vaccine development. *Front Biol (Beijing)* 8: 60–77.
77. Hanley KA (2011) The double-edged sword: How evolution can make or break a live-attenuated virus vaccine. *Evolution (N Y)* 4: 635–643.
78. Magnani DM, Harms JS, Durward MA, Splitter GA (2009) Nondividing but metabolically active gamma-irradiated *Brucella melitensis* is protective against virulent *B. melitensis* challenge in mice. *Infect Immun* 77: 5181–5189. doi: [10.1128/IAI.00231-09](https://doi.org/10.1128/IAI.00231-09) PMID: [19703982](https://pubmed.ncbi.nlm.nih.gov/19703982/)
79. Luca S, Mihaescu T (2013) History of BCG Vaccine. *Maedica (Buchur)* 8: 53–58.
80. Koskiniemi S, Sun S, Berg OG, Andersson DI (2012) Selection-driven gene loss in bacteria. *PLoS Genet* 8: e1002787. doi: [10.1371/journal.pgen.1002787](https://doi.org/10.1371/journal.pgen.1002787) PMID: [22761588](https://pubmed.ncbi.nlm.nih.gov/22761588/)
81. Schurig GG, Roop RM 2nd, Bagchi T, Boyle S, Buhman D, et al. (1991) Biological properties of RB51; a stable rough strain of *Brucella abortus*. *Vet Microbiol* 28: 171–188. PMID: [1908158](https://pubmed.ncbi.nlm.nih.gov/1908158/)
82. Alton GG, Jones LM, Garcia-Carrillo C, Trenchi A (1972) *Brucella melitensis* Rev. 1 and *Brucella abortus* 45–20 vaccines in goats: immunity. *Am J Vet Res* 33: 1747–1751. PMID: [4626469](https://pubmed.ncbi.nlm.nih.gov/4626469/)
83. Elberg SS, Faunce K Jr. (1957) Immunization against *Brucella* infection. VI. Immunity conferred on goats by a nondependent mutant from a streptomycin-dependent mutant strain of *Brucella melitensis*. *J Bacteriol* 73: 211–217. PMID: [13416171](https://pubmed.ncbi.nlm.nih.gov/13416171/)
84. Munoz PM, de Miguel MJ, Grillo MJ, Marin CM, Barberan M, et al. (2008) Immunopathological responses and kinetics of *Brucella melitensis* Rev 1 infection after subcutaneous or conjunctival vaccination in rams. *Vaccine* 26: 2562–2569. doi: [10.1016/j.vaccine.2008.03.030](https://doi.org/10.1016/j.vaccine.2008.03.030) PMID: [18423950](https://pubmed.ncbi.nlm.nih.gov/18423950/)
85. Ficht TA, Pei J, Kahl-McDonagh M (2010) In vitro mutagenesis of *Brucella* species. *Methods Mol Biol* 634: 15–35. doi: [10.1007/978-1-60761-652-8\\_2](https://doi.org/10.1007/978-1-60761-652-8_2) PMID: [20676973](https://pubmed.ncbi.nlm.nih.gov/20676973/)
86. Kohler H, Gyra H, Zimmer K, Drager KG, Burkert B, et al. (2001) Immune reactions in cattle after immunization with a *Mycobacterium paratuberculosis* vaccine and implications for the diagnosis of *M. paratuberculosis* and *M. bovis* infections. *J Vet Med B Infect Dis Vet Public Health* 48: 185–195. PMID: [11393814](https://pubmed.ncbi.nlm.nih.gov/11393814/)
87. Dorneles EM, Lima GK, Teixeira-Carvalho A, Araujo MS, Martins-Filho OA, et al. (2015) Immune Response of Calves Vaccinated with *Brucella abortus* S19 or RB51 and Revaccinated with RB51. *PLoS ONE* 10: e0136696. doi: [10.1371/journal.pone.0136696](https://doi.org/10.1371/journal.pone.0136696) PMID: [26352261](https://pubmed.ncbi.nlm.nih.gov/26352261/)
88. Thom ML, McAulay M, Vordermeier HM, Clifford D, Hewinson RG, et al. (2012) Duration of immunity against *Mycobacterium bovis* following neonatal vaccination with bacillus Calmette-Guerin Danish: significant protection against infection at 12, but not 24, months. *Clin Vaccine Immunol* 19: 1254–1260. doi: [10.1128/CVI.00301-12](https://doi.org/10.1128/CVI.00301-12) PMID: [22718125](https://pubmed.ncbi.nlm.nih.gov/22718125/)
89. Parlane NA, Shu D, Subharat S, Wedlock DN, Rehm BH, et al. (2014) Revaccination of cattle with bacille Calmette-Guerin two years after first vaccination when immunity has waned, boosted protection against challenge with *Mycobacterium bovis*. *PLoS ONE* 9: e106519. doi: [10.1371/journal.pone.0106519](https://doi.org/10.1371/journal.pone.0106519) PMID: [25180583](https://pubmed.ncbi.nlm.nih.gov/25180583/)
90. Van Der Walt ML, Greeff AS (1998) The production of an auxotrophic marked, plasmid-cured *Salmonella* ser. Typhimurium as a live attenuated vaccine. *Onderstepoort J Vet Res* 65: 213–220. PMID: [9809326](https://pubmed.ncbi.nlm.nih.gov/9809326/)
91. Van der Walt ML, Vorster JH, Steyn HC, Greeff AS (2001) Auxotrophic, plasmid-cured *Salmonella enterica* serovar typhimurium for use as a live vaccine in calves. *Vet Microbiol* 80: 373–381. PMID: [11348774](https://pubmed.ncbi.nlm.nih.gov/11348774/)
92. Bardenwerper HW (1954) Human sickness caused by *Brucella abortus*, strain 19. *J Am Med Assoc* 155: 970–971. PMID: [13162836](https://pubmed.ncbi.nlm.nih.gov/13162836/)
93. Montes J, Rodriguez MA, Martin T, Martin F (1986) Laboratory-acquired meningitis caused by *Brucella abortus* strain 19. *J Infect Dis* 154: 915–916. PMID: [3095438](https://pubmed.ncbi.nlm.nih.gov/3095438/)
94. Alton GG, Jones LM, Pietz DE (1975) Laboratory techniques in brucellosis. *Monogr Ser World Health Organ*: 1–163. PMID: [812265](https://pubmed.ncbi.nlm.nih.gov/812265/)

95. Vordermeier HM, Jones GJ, Buddle BM, Hewinson RG (2016) Development of immune-diagnostic reagents to diagnose bovine tuberculosis in cattle. *Vet Immunol Immunopathol*. doi: [10.1016/j.vetimm.2016.02.003](https://doi.org/10.1016/j.vetimm.2016.02.003)
96. Turse JE, Pei J, Ficht TA (2011) Lipopolysaccharide-Deficient Brucella Variants Arise Spontaneously during Infection. *Front Microbiol* 2: 54. doi: [10.3389/fmicb.2011.00054](https://doi.org/10.3389/fmicb.2011.00054) PMID: [21833310](https://pubmed.ncbi.nlm.nih.gov/21833310/)
97. Lalsiamthara J, Gogia N, Goswami TK, Singh RK, Chaudhuri P (2015) Intermediate rough Brucella abortus S19Deltaper mutant is DIVA enable, safe to pregnant guinea pigs and confers protection to mice. *Vaccine* 33: 2577–2583. doi: [10.1016/j.vaccine.2015.04.004](https://doi.org/10.1016/j.vaccine.2015.04.004) PMID: [25869887](https://pubmed.ncbi.nlm.nih.gov/25869887/)
98. Uzzau S, Marogna G, Leori GS, Curtiss R 3rd, Schianchi G, et al. (2005) Virulence attenuation and live vaccine potential of aroA, crp cdt cya, and plasmid-cured mutants of Salmonella enterica serovar Abortusovis in mice and sheep. *Infect Immun* 73: 4302–4308. PMID: [15972523](https://pubmed.ncbi.nlm.nih.gov/15972523/)
99. Nussenzweig RS, Vanderberg J, Most H, Orton C (1967) Protective immunity produced by the injection of x-irradiated sporozoites of plasmodium berghei. *Nature* 216: 160–162. PMID: [6057225](https://pubmed.ncbi.nlm.nih.gov/6057225/)
100. Friedewald WT, Forsyth BR, Smith CB, Gharpure MA, Chanock RM (1968) Low-temperature-grown RS virus in adult volunteers. *JAMA* 204: 690–694. PMID: [5694511](https://pubmed.ncbi.nlm.nih.gov/5694511/)
101. Wright PF, Kervina M, Thompson J, Torrence AE, Karzon DT (1977) Live attenuated influenza vaccines in young seronegative children. *Dev Biol Stand* 39: 99–103. PMID: [604140](https://pubmed.ncbi.nlm.nih.gov/604140/)
102. Graves R (1945) The Story of John M. Buck's and Matilda's Contribution to the Cattle Industry. *Journal of American Veterinary Medical Association* 102: 193–195.
103. Crasta OR, Folkerts O, Fei Z, Mane SP, Evans C, et al. (2008) Genome sequence of Brucella abortus vaccine strain S19 compared to virulent strains yields candidate virulence genes. *PLoS ONE* 3: e2193. doi: [10.1371/journal.pone.0002193](https://doi.org/10.1371/journal.pone.0002193) PMID: [18478107](https://pubmed.ncbi.nlm.nih.gov/18478107/)
104. Secanella-Fandos S, Noguera-Ortega E, Olivares F, Luquin M, Julian E (2014) Killed but metabolically active Mycobacterium bovis bacillus Calmette-Guerin retains the antitumor ability of live bacillus Calmette-Guerin. *J Urol* 191: 1422–1428. doi: [10.1016/j.juro.2013.12.002](https://doi.org/10.1016/j.juro.2013.12.002) PMID: [24333111](https://pubmed.ncbi.nlm.nih.gov/24333111/)
105. Chiang SL, Rubin EJ (2002) Construction of a mariner-based transposon for epitope-tagging and genomic targeting. *Gene* 296: 179–185. PMID: [12383515](https://pubmed.ncbi.nlm.nih.gov/12383515/)
106. Jiang W, Bikard D, Cox D, Zhang F, Marraffini LA (2013) RNA-guided editing of bacterial genomes using CRISPR-Cas systems. *Nat Biotechnol* 31: 233–239. doi: [10.1038/nbt.2508](https://doi.org/10.1038/nbt.2508) PMID: [23360965](https://pubmed.ncbi.nlm.nih.gov/23360965/)
107. Smith LD, Heffron F (1987) Transposon Tn5 mutagenesis of Brucella abortus. *Infect Immun* 55: 2774–2776. PMID: [2822580](https://pubmed.ncbi.nlm.nih.gov/2822580/)
108. Delrue RM, Martinez-Lorenzo M, Lestrade P, Danese I, Bielarz V, et al. (2001) Identification of Brucella spp. genes involved in intracellular trafficking. *Cell Microbiol* 3: 487–497. PMID: [11437834](https://pubmed.ncbi.nlm.nih.gov/11437834/)
109. Bardarov S, Kriakov J, Carriere C, Yu S, Vaamonde C, et al. (1997) Conditionally replicating mycobacteriophages: a system for transposon delivery to Mycobacterium tuberculosis. *Proc Natl Acad Sci U S A* 94: 10961–10966. PMID: [9380742](https://pubmed.ncbi.nlm.nih.gov/9380742/)
110. Kalpana GV, Bloom BR, Jacobs WR Jr. (1991) Insertional mutagenesis and illegitimate recombination in mycobacteria. *Proc Natl Acad Sci U S A* 88: 5433–5437. PMID: [2052623](https://pubmed.ncbi.nlm.nih.gov/2052623/)
111. Hotter GS, Wards BJ, Mouat P, Besra GS, Gomes J, et al. (2005) Transposon mutagenesis of Mb0100 at the ppe1-nrp locus in Mycobacterium bovis disrupts phthiocerol dimycocerosate (PDIM) and glycosylphenol-PDIM biosynthesis, producing an avirulent strain with vaccine properties at least equal to those of M. bovis BCG. *J Bacteriol* 187: 2267–2277. PMID: [15774869](https://pubmed.ncbi.nlm.nih.gov/15774869/)
112. Ficht TA (2002) Discovery of Brucella virulence mechanisms using mutational analysis. *Vet Microbiol* 90: 311–315. PMID: [12414151](https://pubmed.ncbi.nlm.nih.gov/12414151/)
113. Delrue RM, Deschamps C, Leonard S, Nijskens C, Danese I, et al. (2005) A quorum-sensing regulator controls expression of both the type IV secretion system and the flagellar apparatus of Brucella melitensis. *Cell Microbiol* 7: 1151–1161. PMID: [16008582](https://pubmed.ncbi.nlm.nih.gov/16008582/)
114. Arenas-Gamboa AM, Rice-Ficht AC, Fan Y, Kahl-McDonagh MM, Ficht TA (2012) Extended safety and efficacy studies of the attenuated Brucella vaccine candidates 16 M(Delta)vjbR and S19(Delta)vjbR in the immunocompromised IRF-1<sup>-/-</sup> mouse model. *Clin Vaccine Immunol* 19: 249–260. doi: [10.1128/CVI.05321-11](https://doi.org/10.1128/CVI.05321-11) PMID: [22169089](https://pubmed.ncbi.nlm.nih.gov/22169089/)
115. Davies DH, Liang X, Hernandez JE, Randall A, Hirst S, et al. (2005) Profiling the humoral immune response to infection by using proteome microarrays: high-throughput vaccine and diagnostic antigen discovery. *Proc Natl Acad Sci U S A* 102: 547–552. PMID: [15647345](https://pubmed.ncbi.nlm.nih.gov/15647345/)
116. Goel D, Bhatnagar R (2012) Intradermal immunization with outer membrane protein 25 protects Balb/c mice from virulent B. abortus 544. *Mol Immunol* 51: 159–168. doi: [10.1016/j.molimm.2012.02.126](https://doi.org/10.1016/j.molimm.2012.02.126) PMID: [22464098](https://pubmed.ncbi.nlm.nih.gov/22464098/)

117. Gomez G, Pei J, Mwangi W, Adams LG, Rice-Ficht A, et al. (2013) Immunogenic and invasive properties of *Brucella melitensis* 16M outer membrane protein vaccine candidates identified via a reverse vaccinology approach. *PLoS ONE* 8: e59751. doi: [10.1371/journal.pone.0059751](https://doi.org/10.1371/journal.pone.0059751) PMID: [23533646](https://pubmed.ncbi.nlm.nih.gov/23533646/)
118. Lim JJ, Kim DH, Lee JJ, Kim DG, Min W, et al. (2012) Protective effects of recombinant *Brucella abortus* Omp28 against infection with a virulent strain of *Brucella abortus* 544 in mice. *J Vet Sci* 13: 287–292. PMID: [23000585](https://pubmed.ncbi.nlm.nih.gov/23000585/)
119. Delpino MV, Estein SM, Fossati CA, Baldi PC, Cassataro J (2007) Vaccination with *Brucella* recombinant DnaK and SurA proteins induces protection against *Brucella abortus* infection in BALB/c mice. *Vaccine* 25: 6721–6729. PMID: [17686554](https://pubmed.ncbi.nlm.nih.gov/17686554/)
120. Velikovskiy CA, Cassataro J, Giambartolomei GH, Goldbaum FA, Estein S, et al. (2002) A DNA vaccine encoding lumazine synthase from *Brucella abortus* induces protective immunity in BALB/c mice. *Infect Immun* 70: 2507–2511. PMID: [11953389](https://pubmed.ncbi.nlm.nih.gov/11953389/)
121. Zhao Z, Li M, Luo D, Xing L, Wu S, et al. (2009) Protection of mice from *Brucella* infection by immunization with attenuated *Salmonella enterica* serovar typhimurium expressing A L7/L12 and BLS fusion antigen of *Brucella*. *Vaccine* 27: 5214–5219. doi: [10.1016/j.vaccine.2009.06.075](https://doi.org/10.1016/j.vaccine.2009.06.075) PMID: [19596411](https://pubmed.ncbi.nlm.nih.gov/19596411/)
122. Baloglu S, Boyle SM, Vemulapalli R, Sriranganathan N, Schurig GG, et al. (2005) Immune responses of mice to vaccinia virus recombinants expressing either *Listeria monocytogenes* partial listeriolysin or *Brucella abortus* ribosomal L7/L12 protein. *Vet Microbiol* 109: 11–17. PMID: [15941627](https://pubmed.ncbi.nlm.nih.gov/15941627/)
123. Onate AA, Donoso G, Moraga-Cid G, Folch H, Cespedes S, et al. (2005) An RNA vaccine based on recombinant Semliki Forest virus particles expressing the Cu,Zn superoxide dismutase protein of *Brucella abortus* induces protective immunity in BALB/c mice. *Infect Immun* 73: 3294–3300. PMID: [15908354](https://pubmed.ncbi.nlm.nih.gov/15908354/)
124. Davis DS, Templeton JW, Ficht TA, Huber JD, Angus RD, et al. (1991) *Brucella abortus* in Bison. II. Evaluation of strain 19 vaccination of pregnant cows. *J Wildl Dis* 27: 258–264. PMID: [1906114](https://pubmed.ncbi.nlm.nih.gov/1906114/)
125. Fluegel Dougherty AM, Cornish TE, O'Toole D, Boerger-Fields AM, Henderson OL, et al. (2013) Abortion and premature birth in cattle following vaccination with *Brucella abortus* strain RB51. *J Vet Diagn Invest* 25: 630–635. doi: [10.1177/1040638713499570](https://doi.org/10.1177/1040638713499570) PMID: [23942901](https://pubmed.ncbi.nlm.nih.gov/23942901/)
126. Olle-Goig JE, Canela-Soler J (1987) An outbreak of *Brucella melitensis* infection by airborne transmission among laboratory workers. *Am J Public Health* 77: 335–338. PMID: [3812841](https://pubmed.ncbi.nlm.nih.gov/3812841/)
127. Kahl-McDonagh MM, Ficht TA (2006) Evaluation of protection afforded by *Brucella abortus* and *Brucella melitensis* unmarked deletion mutants exhibiting different rates of clearance in BALB/c mice. *Infect Immun* 74: 4048–4057. PMID: [16790778](https://pubmed.ncbi.nlm.nih.gov/16790778/)
128. Kaufmann SH, Gengenbacher M (2012) Recombinant live vaccine candidates against tuberculosis. *Curr Opin Biotechnol* 23: 900–907. doi: [10.1016/j.copbio.2012.03.007](https://doi.org/10.1016/j.copbio.2012.03.007) PMID: [22483201](https://pubmed.ncbi.nlm.nih.gov/22483201/)
129. Macedo AA, Silva AP, Mol JP, Costa LF, Garcia LN, et al. (2015) The abcEDCBA-Encoded ABC Transporter and the virB Operon-Encoded Type IV Secretion System of *Brucella ovis* Are Critical for Intracellular Trafficking and Survival in Ovine Monocyte-Derived Macrophages. *PLoS ONE* 10: e0138131. doi: [10.1371/journal.pone.0138131](https://doi.org/10.1371/journal.pone.0138131) PMID: [26366863](https://pubmed.ncbi.nlm.nih.gov/26366863/)
130. Lopez-Valencia G, Renteria-Evangelista T, Williams Jde J, Licea-Navarro A, Mora-Valle Ade L, et al. (2010) Field evaluation of the protective efficacy of *Mycobacterium bovis* BCG vaccine against bovine tuberculosis. *Res Vet Sci* 88: 44–49. doi: [10.1016/j.rvsc.2009.05.022](https://doi.org/10.1016/j.rvsc.2009.05.022) PMID: [19564029](https://pubmed.ncbi.nlm.nih.gov/19564029/)
131. Diaz-Otero F, Padilla J, Jaramillo L, Gonzalez D, Arriaga C (2008) Evaluation of BCG vaccine and *Mycobacterium bovis* culture filtrate proteins against bovine tuberculosis. *Ann N Y Acad Sci* 1149: 306–308. doi: [10.1196/annals.1428.014](https://doi.org/10.1196/annals.1428.014) PMID: [19120235](https://pubmed.ncbi.nlm.nih.gov/19120235/)
132. Wedlock DN, Skinner MA, Parlane NA, Vordermeier HM, Hewinson RG, et al. (2003) Vaccination with DNA vaccines encoding MPB70 or MPB83 or a MPB70 DNA prime-protein boost does not protect cattle against bovine tuberculosis. *Tuberculosis (Edinb)* 83: 339–349.
133. Skinner MA, Buddle BM, Wedlock DN, Keen D, de Lisle GW, et al. (2003) A DNA prime-*Mycobacterium bovis* BCG boost vaccination strategy for cattle induces protection against bovine tuberculosis. *Infect Immun* 71: 4901–4907. PMID: [12933831](https://pubmed.ncbi.nlm.nih.gov/12933831/)
134. Vordermeier HM, Villarreal-Ramos B, Cockle PJ, McAulay M, Rhodes SG, et al. (2009) Viral booster vaccines improve *Mycobacterium bovis* BCG-induced protection against bovine tuberculosis. *Infect Immun* 77: 3364–3373. doi: [10.1128/IAI.00287-09](https://doi.org/10.1128/IAI.00287-09) PMID: [19487476](https://pubmed.ncbi.nlm.nih.gov/19487476/)
135. Verreck FA, Vervenne RA, Kondova I, van Kralingen KW, Remarque EJ, et al. (2009) MVA.85A boosting of BCG and an attenuated, phoP deficient *M. tuberculosis* vaccine both show protective efficacy against tuberculosis in rhesus macaques. *PLoS ONE* 4: e5264. doi: [10.1371/journal.pone.0005264](https://doi.org/10.1371/journal.pone.0005264) PMID: [19367339](https://pubmed.ncbi.nlm.nih.gov/19367339/)

136. Dietrich J, Billeskov R, Doherty TM, Andersen P (2007) Synergistic effect of bacillus calmette guerin and a tuberculosis subunit vaccine in cationic liposomes: increased immunogenicity and protection. *J Immunol* 178: 3721–3730. PMID: [17339470](#)
137. Pym AS, Brodin P, Majlessi L, Brosch R, Demangel C, et al. (2003) Recombinant BCG exporting ESAT-6 confers enhanced protection against tuberculosis. *Nat Med* 9: 533–539. PMID: [12692540](#)
138. Vemulapalli R, Contreras A, Sanakkayala N, Sriranganathan N, Boyle SM, et al. (2004) Enhanced efficacy of recombinant *Brucella abortus* RB51 vaccines against *B. melitensis* infection in mice. *Vet Microbiol* 102: 237–245. PMID: [15327798](#)
139. Rajasekaran P, Surendran N, Seleem MN, Sriranganathan N, Schurig GG, et al. (2011) Over-expression of homologous antigens in a leucine auxotroph of *Brucella abortus* strain RB51 protects mice against a virulent *B. suis* challenge. *Vaccine* 29: 3106–3110. doi: [10.1016/j.vaccine.2011.02.054](#) PMID: [21376799](#)
140. Pym AS, Brodin P, Brosch R, Huerre M, Cole ST (2002) Loss of RD1 contributed to the attenuation of the live tuberculosis vaccines *Mycobacterium bovis* BCG and *Mycobacterium microti*. *Mol Microbiol* 46: 709–717. PMID: [12410828](#)
141. Blanco FC, Bianco MV, Garbaccio S, Meikle V, Gravisaco MJ, et al. (2013) *Mycobacterium bovis* Del-tamce2 double deletion mutant protects cattle against challenge with virulent *M. bovis*. *Tuberculosis (Edinb)* 93: 363–372.
142. Fang H, Yu D, Hong Y, Zhou X, Li C, et al. (2013) The LuxR family regulator Rv0195 modulates *Mycobacterium tuberculosis* dormancy and virulence. *Tuberculosis (Edinb)* 93: 425–431.
143. Fukazawa Y, Park H, Cameron MJ, Lefebvre F, Lum R, et al. (2012) Lymph node T cell responses predict the efficacy of live attenuated SIV vaccines. *Nat Med* 18: 1673–1681. doi: [10.1038/nm.2934](#) PMID: [22961108](#)
144. Lycke N (2004) From toxin to adjuvant: the rational design of a vaccine adjuvant vector, CTA1-DD/ISCOM. *Cell Microbiol* 6: 23–32. PMID: [14678328](#)
145. (2011) Proceedings of a symposium: Smallpox Eradication after 30 Years: Lessons, Legacies and Innovations, August 24–27, 2010, Rio de Janeiro, Brazil. *Vaccine* 29 Suppl 4: D1–154.
146. Hesseling AC, Rabie H, Marais BJ, Manders M, Lips M, et al. (2006) Bacille Calmette-Guerin vaccine-induced disease in HIV-infected and HIV-uninfected children. *Clin Infect Dis* 42: 548–558. PMID: [16421800](#)
147. Zhao K, Chen G, Shi XM, Gao TT, Li W, et al. (2012) Preparation and efficacy of a live newcastle disease virus vaccine encapsulated in chitosan nanoparticles. *PLoS ONE* 7: e53314. doi: [10.1371/journal.pone.0053314](#) PMID: [23285276](#)
